# Supplementary material for: Reassessing Rabbit Antithymocyte Globulin Induction in Kidney Transplantation (RETHINK): An Analysis of the North American Pediatric Renal Trials and Collaborative Studies (NAPRTCS) Registry
Source: PubMed Central journal article supplement — Transplant Direct. 2020 Aug 21;6(9):e598. doi: 10.1097/TXD.0000000000001042 (PMC7447457; doi:10.1097/txd.0000000000001042), 2020-08-21

**Table S1:** Hospitalization due to infection through 12 months post–kidney transplant in the study cohort

| Twelve month Follow-up            | Cumulative rATG induction dose |              |            |              | Total      |              | P-value |
|-----------------------------------|--------------------------------|--------------|------------|--------------|------------|--------------|---------|
|                                   | <7.5 mg/kg                     |              | ≥7.5 mg/kg |              |            |              |         |
|                                   | N                              | %            | N          | %            | N          | %            |         |
| <b>Total</b>                      | <b>231</b>                     | <b>100.0</b> | <b>124</b> | <b>100.0</b> | <b>355</b> | <b>100.0</b> | 0.98    |
| <b>Hospitalized for infection</b> |                                |              |            |              |            |              |         |
| <b>No</b>                         | 186                            | 80.5         | 100        | 80.6         | 286        | 80.6         |         |
| <b>Yes</b>                        | 45                             | 19.5         | 24         | 19.4         | 69         | 19.4         |         |
| <b>Type</b>                       |                                |              |            |              |            |              |         |
| <b>Bacterial</b>                  | 25                             | 10.8         | 11         | 8.9          | 36         | 10.1         |         |
| <b>Viral</b>                      | 21                             | 9.1          | 15         | 12.1         | 36         | 10.1         |         |
| <b>Fungal</b>                     | 0                              | 0.0          | 0          | 0.0          | 0          | 0.0          |         |

**Table S2:** Comparison of estimated GFR at 6 months and 12 months

| 6 month follow-up         | Cumulative dose <7.5 mg/kg |         |       |         |              |      |        | Cumulative dose ≥7.5 mg/kg |         |       |         |              |       |        | Kruskal-Wallis p-value |
|---------------------------|----------------------------|---------|-------|---------|--------------|------|--------|----------------------------|---------|-------|---------|--------------|-------|--------|------------------------|
|                           | N                          | Missing | Mean  | Std Dev | Median       | Min  | Max    | N                          | Missing | Mean  | Std Dev | Median       | Min   | Max    |                        |
| Modified Schwartz formula | 245                        | 6       | 71.34 | 28.75   | <b>67.11</b> | 1.36 | 340.73 | 132                        | 3       | 65.29 | 23.42   | <b>63.53</b> | 11.08 | 185.85 | <b>0.03</b>            |
| 12 month follow-up        | Cumulative dose <7.5 mg/kg |         |       |         |              |      |        | Cumulative dose ≥7.5 mg/kg |         |       |         |              |       |        | Kruskal-Wallis p-value |
|                           | N                          | Missing | Mean  | Std Dev | Median       | Min  | Max    | N                          | Missing | Mean  | Std Dev | Median       | Min   | Max    |                        |
| Modified Schwartz formula | 225                        | 6       | 69.60 | 25.54   | <b>65.50</b> | 6.23 | 185.02 | 123                        | 1       | 63.38 | 22.24   | <b>62.54</b> | 10.33 | 140.56 | <b>0.04</b>            |

**Figure S1: Timing of rATG induction initiation post-kidney transplant**

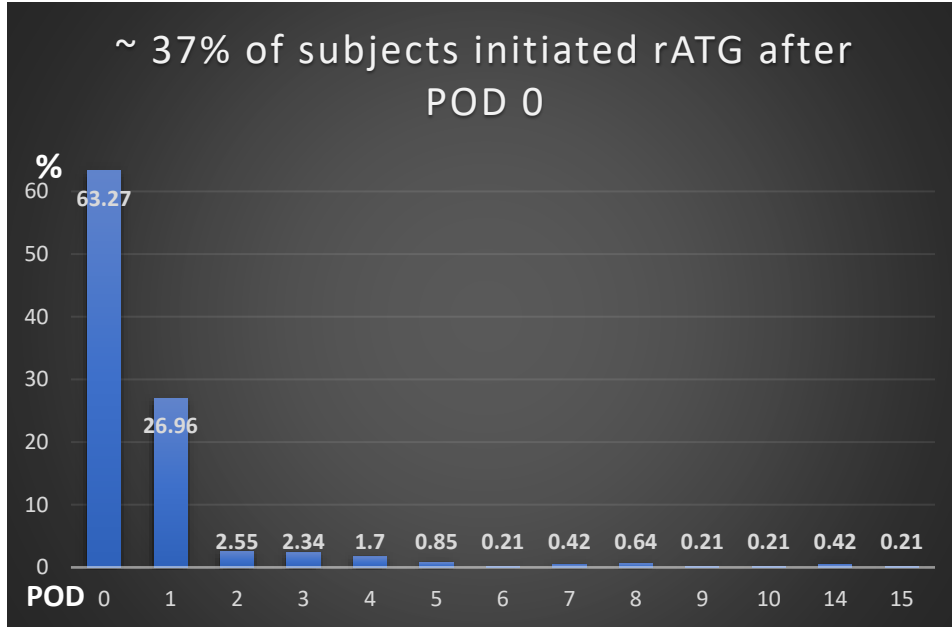

**Figure S2: Median cumulative rATG induction dose (mg/kg) over the NAPRTCS registry period 1999-2016:**

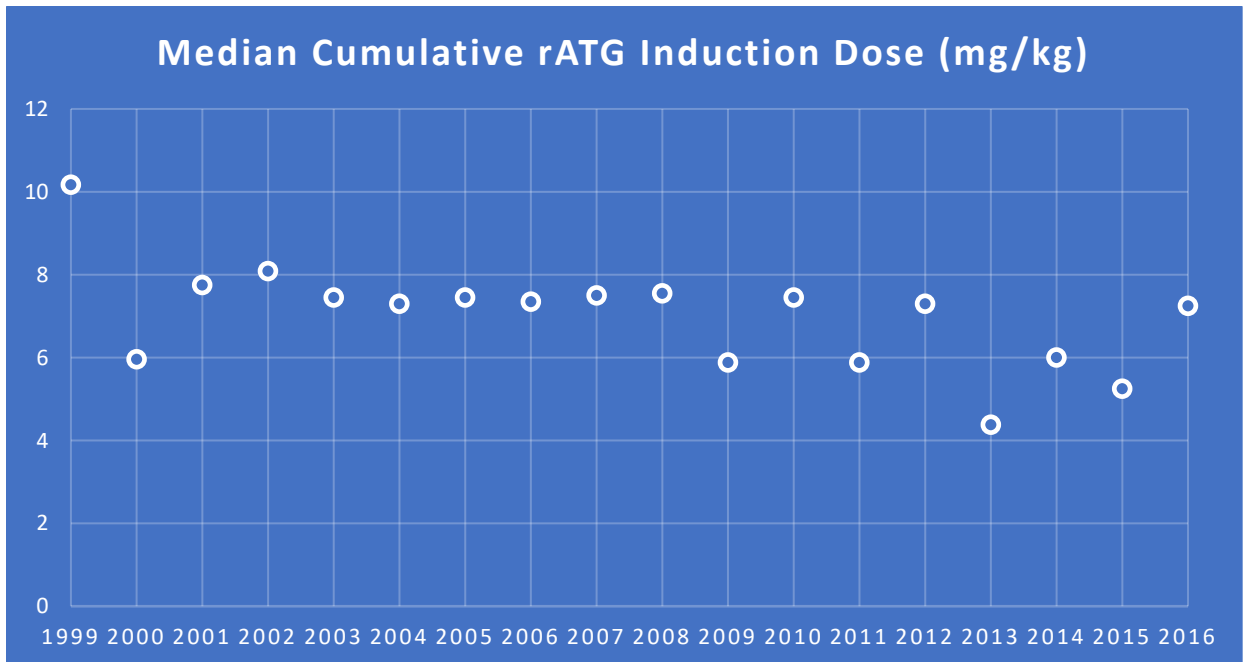

Supplement: txd-6-e598-s001.pdf [file txd-6-e598-s001.pdf]
